# Supplementary material for: A highly conserved host lipase deacylates oxidized phospholipids and ameliorates acute lung injury in mice
Source: eLife journal article supplement (doi:10.7554/elife.70938), 2021-11-02

Figure\_1\_figure\_supplement\_1\_source\_data\_2

Fig. 1--figure supplement 1 B

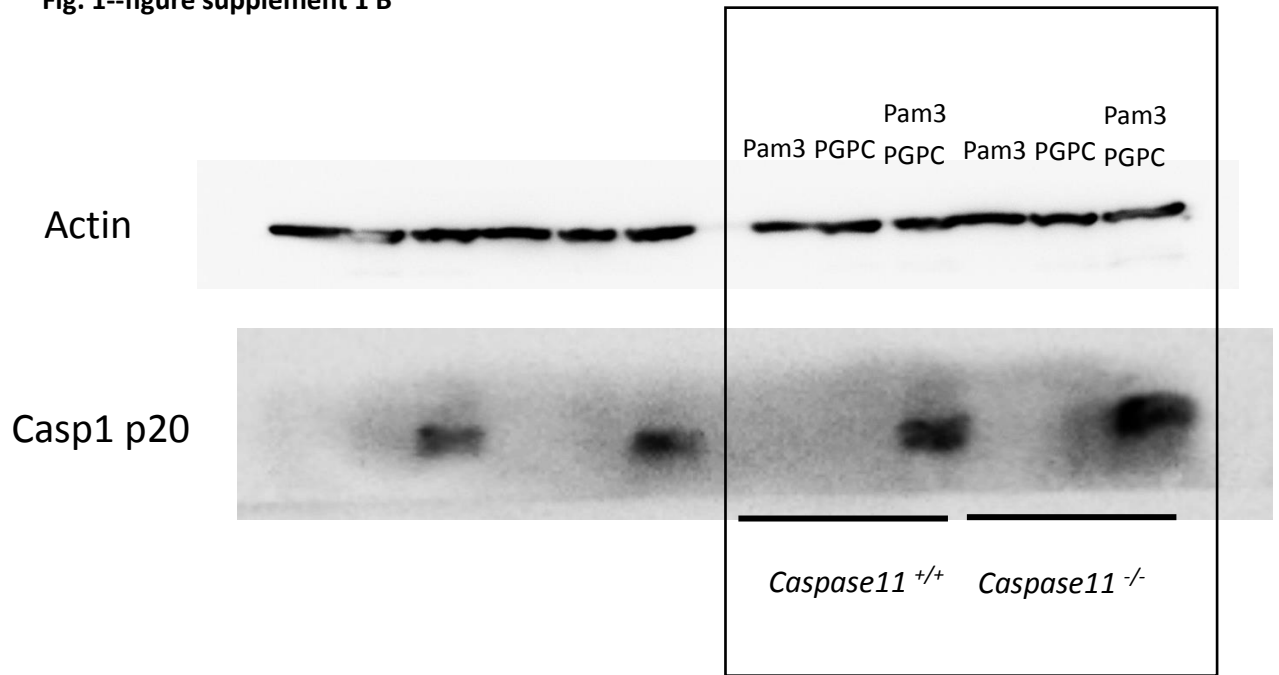

Supplement: fig1-figsupp1-data2 [file elife-70938-fig1-figsupp1-data2-v1.pdf]
