# Supplementary material for: A highly conserved host lipase deacylates oxidized phospholipids and ameliorates acute lung injury in mice
Source: eLife journal article supplement (doi:10.7554/elife.70938), 2021-11-02

Figure\_2\_source\_data\_2

Fig. 2F

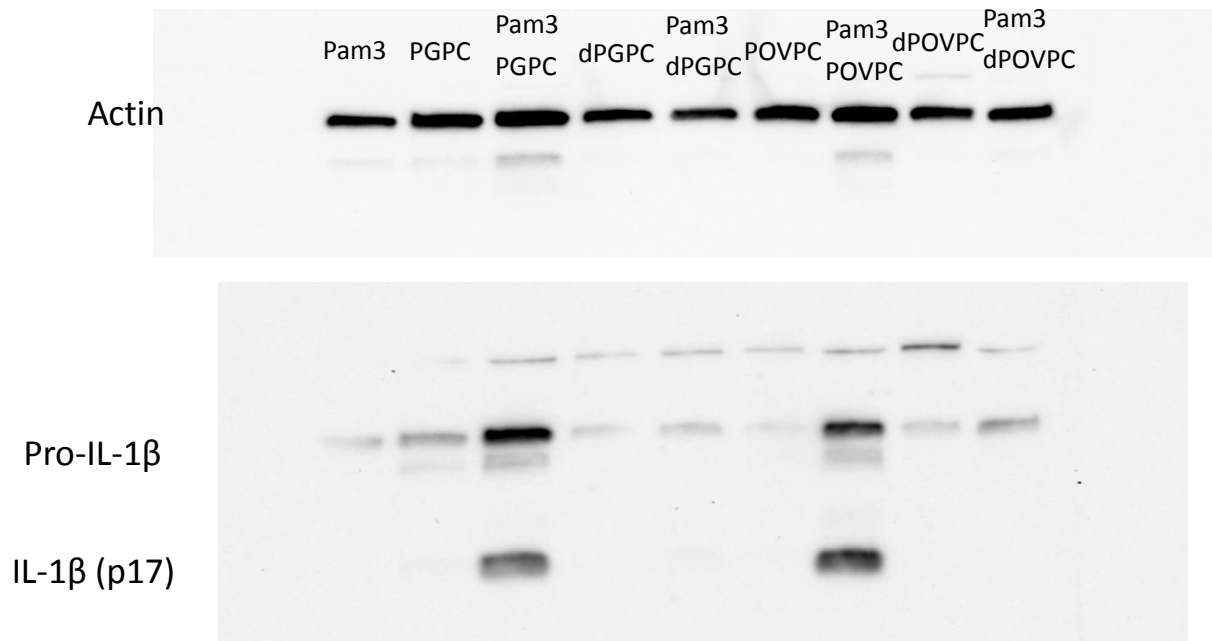

Supplement: fig2-data2 [file elife-70938-fig2-data2-v1.pdf]
