# Supplementary material for: A highly conserved host lipase deacylates oxidized phospholipids and ameliorates acute lung injury in mice
Source: eLife journal article supplement (doi:10.7554/elife.70938), 2021-11-02
Supplement: fig7-data2 [file elife-70938-fig7-data2-v1.pdf]

Figure\_7\_source\_data\_2

Fig. 7E

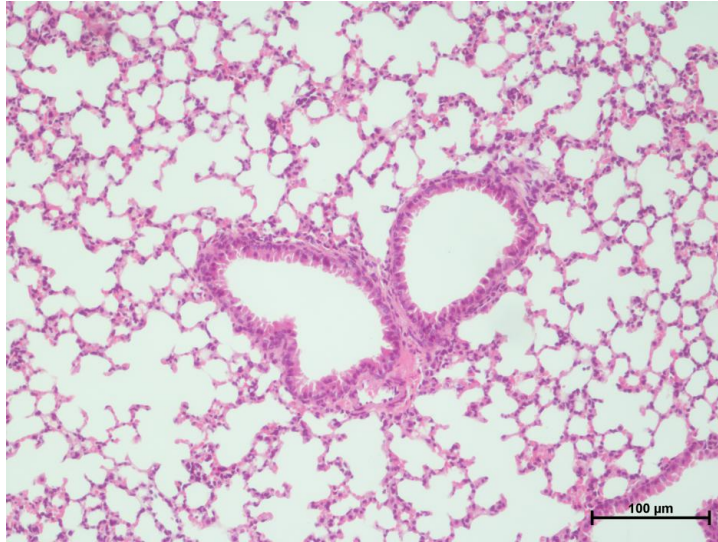

*Aohh*<sup>+/+</sup> PBS

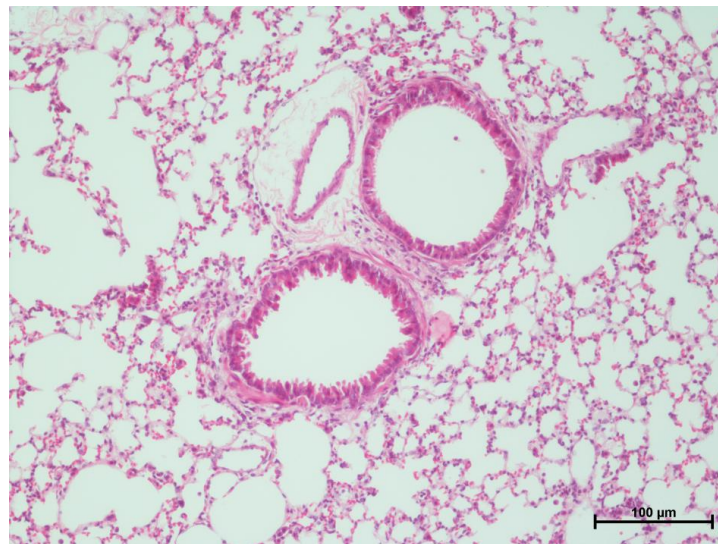

*Aohh*<sup>-/-</sup> PBS

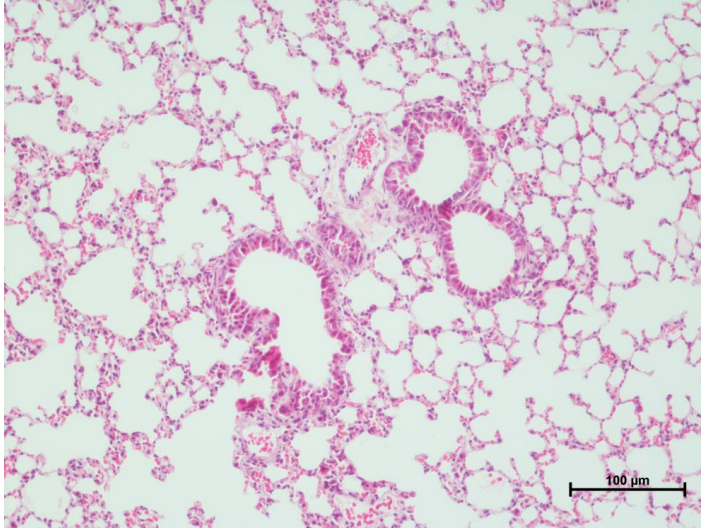

*Aosh<sup>+/+</sup>*

HCl+Ventilation

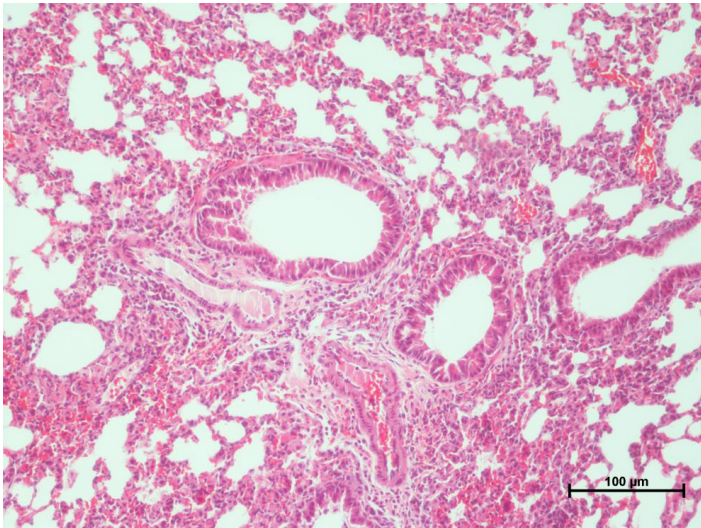

*Aosh<sup>-/-</sup>*

HCl+Ventilation
