# Supplementary material for: A highly conserved host lipase deacylates oxidized phospholipids and ameliorates acute lung injury in mice
Source: eLife. 2021 Nov 16;10:e70938. doi: 10.7554/eLife.70938 (PMC8594946; doi:10.7554/eLife.70938)
Supplement: Figure 1—figure supplement 1—source data 1. [file elife-70938-fig1-figsupp1-data1.xlsx]

## Sheet: Sheet1
	Figure_1_figure_supplement_1_source_data_1
	Fig. 1--figure supplement 1 A
	IL-1β (ng/ml)	Caspase11+/+											Caspase11-/-
	Medium	0.01	0.01	0	0.024	0.247	0.057	0.18	0.009	0.012	0.014		0.01	0.01	0.01	0.042	0.023	0.068	0.034	0.037	0.044	0.029
	Pam3	0.14	0.14	0.15	0.2	0.07	0.191	0.337	0.117	0.136	0.151		0.22	0.2	0.16	0.2	0.357	0.051	0.566	0.315	0.288	0.243
	PGPC	0.01	0.01	0.03									0.01	0.01	0.01
	Pam3 + PGPC	1.69	3.8	4.33	4.593	4.404	3.625	9.02	2.79	4.585	2.757	2.962	4.31	4.47	3.97	1.812	1.722	2.052	2.065	5.326	6.505	4.633
	Fig. 1--figure supplement 1 C
	Casp1 p20/Actin (Arbitrary units)	Caspase11+/+				Caspase11-/-
	Pam3	0.114	0.096	0.128	0.24	0.116	0.081	0.253	0.16
	PGPC	0.302	0.125	0.257	0.565	0.24	0.197	0.437	0.332
	Pam3 + PGPC	1.037	0.752	0.521	0.757	0.709	0.732	0.778	0.736
