# Supplementary material for: A highly conserved host lipase deacylates oxidized phospholipids and ameliorates acute lung injury in mice
Source: eLife. 2021 Nov 16;10:e70938. doi: 10.7554/eLife.70938 (PMC8594946; doi:10.7554/eLife.70938)
Supplement: Figure 5—figure supplement 1—source data 1. [file elife-70938-fig5-figsupp1-data1.xlsx]

## Sheet: Sheet1
	Figure_5_figure_supplement_1_source_data_1
	IL-1β (ng/ml)	Sequential	Simultaneous			IL-6 (ng/ml)	Sequential	Simultaneous
		6.18	4.76				49.27	64.25
		8.47	9.09				41.21	57.48
		4.8	3.74				35.4	56.73
		3.7	5.16				37.81	56.1
		8.71	6.95				56.78	23.63
		7.9	7.25				56.64	41.21
		7.39	6.46				53.57	45.84
		8.26	7.01				59.16	36.16
			5.22					62
			5.34					57.4
			5.08					54
			5.64					61.2
			3.75					30.7
