# Supplementary material for: A highly conserved host lipase deacylates oxidized phospholipids and ameliorates acute lung injury in mice
Source: eLife. 2021 Nov 16;10:e70938. doi: 10.7554/eLife.70938 (PMC8594946; doi:10.7554/eLife.70938)
Supplement: Figure 5—source data 1. [file elife-70938-fig5-data1.xls]

## Sheet: Sheet1
	Figure_5_source_data_1
	Fig. 5A
	AOAH Relative mRNA	Naive	LPS	oxPLs	LPS + oxPLs
		1	108	4.4	48.7
		0.7	63.4	2.1	20.4
		1.5	141.8	4.2	27.8
		1.7	104.5	10.8	42.6
		0.5	111.6	9.8	71.6
		0.2	97.1	16.6	8.6
		0.4	108.9	11.7	27.3
		0.6	74.9	2.6	31.4
		1.6	104.9	2.1	47.8
	Fig. 5B
	Protein (mg)	Aoah+/+												Aoah-/-
	Naive	0.26	0.32	0.34	0.42	0.42	0.45	0.14	0.53	0.21	0.38	0.25	0.2	0.26	0.27	0.23	0.42	0.35	0.27	0.19	0.26	0.65	0.24	0.47	0.31
	LPS	0.62	0.65	0.6	0.68	0.57	0.8	0.5	0.5	0.81				0.56	0.58	0.44	1.22	0.73	0.81	0.62	0.37	0.39
	oxPLs	0.44	0.3	0.33	0.45	0.55	0.5	0.38	0.51	0.75	0.39	0.47		0.55	0.48	0.41	0.41	0.76	0.46	0.77	0.73	0.53	0.46	0.32	0.51
	LPS + oxPLs	0.9	0.4	0.8	0.57	0.84	1.03	0.28	0.98	1.28	1.14			1.25	0.9	1.35	1.09	3.04	1.4	1.81	1.05	1.4	1.5	1.47	0.81
	Fig. 5C
	Total cells (10^5)	Aoah+/+												Aoah-/-
	Naive	4.41	3.75	3.33	2.25	1.99	2.51	2.95	5.01	3.16	3.87	3.44	2.13	4.03	3.75	5.1	4.39	2.27	2.06	3.72	4.09	3.44	3.82	4.77	2.01
	LPS	41.6	32.2	53.4	22.8	35.6	24.2	50.8	47.2	72.1				39.4	28.8	46	38.8	26	31	42.4	48.8	66
	oxPLs	3.37	1.97	4.51	4.75	6.26	6.13	7.01	5.63	8.295	6.37			5.09	15.4	27.4	8.8	4.44	5.61	12.54	10.35	6.24	16.1	9.7	10.65
	LPS + oxPLs	45.9	18.09	38.1	15.74	22.2	31.2	42.45	55.8	43.6	58			69.9	40.2	92.1	49.4	46.6	50.2	47.55	54.9	73.8	64.8	75.15	68.4
	Neutrophils (10^5)	Aoah+/+												Aoah-/-
	Naive	0.03	0.01	0.01	0.01	0.01	0.02	0.01	0.03	0.01	0.04	0.02	0.01	0.03	0.01	0.03	0.01	0.01	0.01	0.01	0.01	0.02	0.01	0.03	0.01
	LPS	35.78	28.87	48.06	19.15	30.38	20.65	47.9	43.6	69				35.33	25.25	41.86	33.5	22.79	25.94	39.4	46.5	61.6
	oxPLs	0.06	0.02	0.21	0.6	0.17	0.08	0.21	0.06	15.3	8			0.03	7.34	0.15	0.06	0.07	0.17	0.07	0.08	11.9	9	10.1	0.56
	LPS + oxPLs	41.92	11.88	34.67	13.12	18.43	27.04	35.52	49.8	38.7	52.6			63.38	36.72	84.73	45.12	43.49	47.02	42.32	46.48	68.8	59.29	71.1	61.6
	Mono-Macs (10^5)	Aoah+/+												Aoah-/-
	Naive	4.37	3.73	3.3	2.24	1.98	2.48	2.93	4.98	3.14	3.8	3.4	2.1	3.98	3.73	5.05	4.35	2.25	2.05	3.68	4.06	3.39	3.8	4.7	2
	LPS	5.27	3.11	4.98	3.42	4.87	3.23	2.7	3.5	2.9				3.81	3.07	3.83	4.91	3.03	4.86	2.8	2.1	4.2
	oxPLs	3.29	1.94	4.25	4.02	6.05	5.95	6.65	5.53	8	6.2			5.04	7.91	6.58	8.54	4.35	5.5	12.25	10.25	6.09	12.4	8.2	10.2
	LPS + oxPLs	3.83	6.09	3.3	2.52	3.33	3.85	6.79	5.8	4.8	5.2			6.06	3.22	7.06	4.28	2.8	2.84	5.07	8.42	5.8	3.8	4.6	6.82
	Lymphocytes (10^5)	Aoah+/+												Aoah-/-
	Naive	0.01	0.01	0.02	0.01	0.01	0.02	0.01	0.02	0.01	0.01	0.01	0.01	0.03	0.01	0.02	0.03	0.01	0.01	0.02	0.01	0.02	0.01	0.02	0.01
	LPS	0.55	0.21	0.36	0.23	0.36	0.32	0.17	0.16	0.24				0.26	0.48	0.31	0.39	0.17	0.21	0.14	0.16	0.22
	oxPLs	0.02	0.01	0.05	0.13	0.04	0.1	0.14	0.04	0.17	0.03			0.02	0.15	0.09	0.12	0.03	0.04	0.13	0.03	0.06	0.11	0.13	0.21
	LPS + oxPLs	0.15	0.12	0.25	0.1	0.44	0.31	0.14	0.19	0.19	0.15			0.47	0.27	0.31	0.16	0.31	0.33	0.16	0.18	0.49	0.22	0.25	0.23
	Fig. 5D
	IL-6 Relative mRNA	Aoah+/+												Aoah-/-
	Naive	1.54	1.46	1.41	0.71	1.45	0.97	1.21	2.34	0.82	1.1	0.54		0.49	0.83	0.38	0.46	0.6	0.86	3.08	1.47	0.56	0.66	0.71	2.33
	LPS	42.32	21.31	51.92	103.61	52.89	69.47	20.65	25.43					33.09	51.39	13.35	38.99	42.22	20.94	263.81	33.21
	oxPLs	1.84	0.81	1.2	0.66	1.46	0.11	1.57	3.85	6.45	1.94	2.3		0.62	1.04	1.56	0.58	3.29	1.53	4.52	1.02	5.98	7.38	4.28	2.62
	LPS + oxPLs	5.55	1.26	6.42	28.15	27.19	9.44	5.19	9.99	31.41				8.27	9.31	30.55	64.89	40.5	16.17	81.48	46.69	56.3	10.11
	TNF Relative mRNA	Aoah+/+												Aoah-/-
	Naive	0.98	0.97	0.86	1.32	1.46	1.47	1.09	1.76	0.92	1.73	3.54	0.87	1.19	1.23	1.36	0.69	0.29	0.34	1.46	1.86	0.85	0.84	1.8	0.94
	LPS	28.21	12.11	83.77	33.53	40.43	50.13	61.72	22.36	40.02				20.44	40.16	15.33	16.31	10.36	31.95	196.4	15.54
	oxPLs	1.2	0.6	1.62	0.49	1.66	0.27	0.04	1.01	2.67	2.1	2.18		1.65	3.82	3.11	1.26	1.39	4.46	2.73	0.88	1.6	1.49	1.84	2.23
	LPS + oxPLs	13.67	3.81	9.08	10.07	6.95	20.5	1.75	6.67	25.42	12.49			10.65	21.16	34.02	25.06	14.1	7.3	58.99	28.99	35.57	20.36	42.89	24.38
	IL-1β Relative mRNA	Aoah+/+												Aoah-/-
	Naive	8.7	5.9	0.57	1.99	0.88	2.33	4.06	2.8	1.01	0.66	1.52		4.3	5.3	2.9	0.14	1.51	2.43	1.73	1.61	1.33	0.23	0.47	1.32
	LPS	23.6	9.2	33.2	5.44	9.24	8.16	7.26	3.23	2.95				19.1	27.3	19.9	0.98	5.69	5.73	3.56	17.45	4.52
	oxPLs	3.2	9.1	2.3	0.2	3.23	0.31	3.19	4.65	0.68	0.7	0.38		1.7	3.3	6.3	0.77	0.64	5.73	4.9	3.14	3.44	0.72	0.52	0.71
	LPS + oxPLs	15.8	6.4	10.1	10.01	6.03	16.26	4.36	17.18	20.4	2.84	9.07		14	16.3	31.1	20.3	8.42	91.32	54.11	48.77	8.73	15.04
	MCP-1 Relative mRNA	Aoah+/+												Aoah-/-
	Naive	0.75	1.02	1.89	0.8	0.77	1.63	1.23	0.81	1.66	3.41	0.84		0.52	0.76	0.45	0.12	0.47	0.36	3.49	2.88	2.3	0.81	1.73	0.9
	LPS	30.38	27.95	61.18	23.37	35.55	41.55	59.44	21.53	38.54				24	32.56	31.45	17.59	18.53	30.77	189.15	14.96
	oxPLs	2.54	0.59	2.81	0.32	0.93	0.24	2.03	2.1	2.57				2.44	3.46	2.6	2.09	1.34	10.2	1.8	9.42	1.78	2.15
	LPS + oxPLs	8.31	2.35	8.75	36.93	18.98	46.9	4.36	14.62	12.03	24.48			18.19	33.13	58.35	57.75	14.39	63.78	13.83	19.61	41.31	23.48
	IL-10 Relative mRNA	Aoah+/+												Aoah-/-
	Naive	0.45	0.45	3.3	0.33	0.88	0.54	0.42	2.42	0.25	0.43	0.31		0.68	1.34	1.19	0.23	1.99	0.2	2.83	3.61	0.99	0.86	0.29	0.62
	LPS	0.84	2.49	4.2	1.27	3.61	2.56	0.73	6.25					2	1.21	3.49	1.24	1.15	1.92	5.04	2.84
	oxPLs	0.18	0.32	0.69	0.79	3.04	1.77	0.62	0.32	8.25	0.27	1.55		1.68	1.28	1.7	0.69	0.31	5.92	0.62	3.4	0.51	0.68	4.46
	LPS + oxPLs	0.93	0.3	0.93	0.74	0.78	1.27	0.51	1.35	0.54	1.25	1		2.22	2.18	2.28	2.86	4.46	1.04	5.1	6.61	11.76	1.47	3.25	2.96
	IRAK-M Relative mRNA	Aoah+/+												Aoah-/-
	Naive	1.21	1.97	0.76	0.61	1.23	1.34	0.59	0.83	0.25	0.35			0.67	1.09	0.99	0.26	0.91	0.34	0.81	0.7	0.5
	LPS	0.82	0.81	2.14	0.79	1.77	4.59	2.07	0.6					1.01	0.67	1.3	1.18	0.7	1.56	4.09	2.3
	oxPLs	0.66	0.53	0.65	0.02	0.56	0.2	0.38	0.49	6.7	0.22	1.26		0.8	0.67	0.59	0.53	0.89	2.03	0.37	0.45	0.36	0.41	0.55	3.63
	LPS + oxPLs	1.09	0.52	0.65	1.53	0.69	1.39	0.75	0.78	0.44	1.02	0.81		1.23	1.61	1.75	2.72	1.71	1.01	2.88	1.36	1.44	1.19	2.64	2.4
	Fig. 5E
	IL-6 (pg)	Aoah+/+							Aoah-/-
	Naive	0	0	0	0	0	0		0	0	0	0	0	0
	LPS	946.9	740.3	661.7	1306.5	1163.7	1622.4		1301.1	1045.6	584	1914	851.4	967.8
	oxPLs	0	0	0	28.5	42	0	7.8	15.7	0	0	0	20.3	4.2	9.8
	LPS + oxPLs	416.1	425	1238.2	1087.6	1456.2	2022.3	562.4	766	1147.2	2352	2130.6	3158.7	1586.2	3098.7
	TNF (pg)	Aoah+/+							Aoah-/-
	Naive	0	0	0	0	0	0		0	0	0	0	0	0
	LPS	298.8	335.3	274.2	551.6	546.3	1039.8		288.9	547.3	224.4	1111.7	495.3	489.9
	oxPLs	0	0	0	0	0	0	0	0	0	0	0	0	0	0
	LPS + oxPLs	122.4	125.1	226.5	315.5	217.2	374.4	411.8	194.7	570.9	351	489.5	898.2	632.4
	IL-1β (pg)	Aoah+/+							Aoah-/-
	Naive	0	0	0	0	0	0		0	0	0	0	0	0
	LPS	135.72	154.19	154.83	306	280.5	343		174.63	174.3	113.83	349.6	329.7	234
	oxPLs	9.99	0	12.04	16.13	9.4	0	0	10.87	8.24	16.71	9.7	0	21.7	24.9
	LPS + oxPLs	62.45	63.95	157.08	151.62	117.9	166.8	223.2	169.4	95.99	193.51	217.97	288	314.6	309.2
	Fig. 5F
	Total cells (10^5)	Aoah+/+													Aoah-/-
	PBS	2.95	5.01	3.16	3.87	3.44	2.13								4.39	2.27	2.06	3.82	4.77	2.01
	Sp	5.81	4.82	2.65	5.13	4.23	2.18								4.28	3.91	3.6	6.26	7.37	5.32	3.53
	Sp + oxPLs	10.3	9.85	6.55	7.42	5.09	10.6	3.1	7.36	3.25	4.69	5.64	3.43	5.08	16.14	20.2	8.64	11	6.16	5.72	4.02	21.6	13.2	20.1
	Neutrophils (10^5)	Aoah+/+													Aoah-/-
	PBS	0.03	0.01	0.01	0.01	0.01	0.02								0.03	0.01	0.03	0.01	0.02	0.01
	Sp	0.35	0.14	0.04	1.95	0.59	0.15								0.48	0.07	0.11	0.06	0.86	0.6	0.91
	Sp + oxPLs	2.47	4.24	0.17	0.72	0.05	2.3	0.01	2.55	0.16	0.03	1.15	0.61	0.17	6.94	5.59	0.69	5.1	0.21	0.1	0.52	2.81	1.76	6.16
	Mono-Macs (10^5)	Aoah+/+													Aoah-/-
	PBS	4.37	3.73	3.3	2.93	4.98	3.14								3.98	3.73	5.05	3.68	4.06	3.39
	Sp	5.25	4.66	2.61	3.15	3.62	2.01								3.67	4.82	5.18	3.46	3.41	3.27	2.66
	Sp + oxPLs	7.76	5.58	6.35	6.65	5.02	8.27	3.07	4.78	3.08	4.64	4.47	2.78	4.89	9.15	14.54	7.92	5.9	5.93	5.53	3.47	18.72	11.4	13.8
	Lymphocytes (10^5)	Aoah+/+													Aoah-/-
	PBS	0.01	0.01	0.02	0.01	0.02	0.01								0.03	0.01	0.01	0.02	0.01	0.02
	Sp	0.02	0.02	0.01	0.03	0.01	0.01								0.02	0.02	0.04	0.01	0.01	0.04	0.02
	Sp + oxPLs	0.069	0.033	0.022	0.049	0.017	0.035	0.02	0.02	0.01	0.02	0.02	0.02	0.02	0.054	0.067	0.029	0.02	0.04	0.03	0.07	0.04	0.07
	Fig. 5G
	IL-6 Relative mRNA	Aoah+/+													Aoah-/-
	PBS	0.78	1.45	0.97	1.64	0.72	1.02								1.65	0.81	2.33	0.92	0.99	1.26
	Sp	2.73	1.29	0.53	2.28	0.66	1.05								2.81	0.97	1.68	2.45	1.01	1.06	1.68
	Sp + oxPLs	1.36	2.29	0.54	3.03	1.67	0.97	0.82	2.12	1.46	2.17	1.14	0.58	0.36	2.99	1.99	8	0.93	6.26	1.16	1.77	1.1	2.69
	TNF Relative mRNA	Aoah+/+													Aoah-/-
	PBS	1.32	0.91	1.12	0.49	0.86	0.78								1.36	0.88	1.28	0.79	0.53	1.23
	Sp	1.04	0.57	0.69	0.98	0.53	0.79								1.41	0.58	1.24	1.06	1.04	1.32
	Sp + oxPLs	0.88	1.05	0.27	1.13	0.67	0.61	0.43	1.09	0.69	0.86	1.13	0.82	0.55	1.38	2.02	0.3	1.09	0.5	0.74	0.42	0.87	1.11	2.13
	MCP-1 Relative mRNA	Aoah+/+													Aoah-/-
	PBS	0.57	1.59	2.95	0.86	0.72	1.02								2.26	0.878	1.73	0.56	0.69	1.55
	Sp	1.59	0.67	0.46	1.24	0.56	0.92								1.91	0.61	0.68	1.79	1.54	1.95	2.13
	Sp + oxPLs	0.01	0.01	0.18	2.95	1.36	0.92	0.19	2.28	0.47	0.7	3.82	0.77	0.6	6.24	3.74	0.41	3.03	0.26	0.54	0.37	2.74	2.44	6.38
	KC Relative mRNA	Aoah+/+													Aoah-/-
	PBS	0.81	0.53	1.16	0.72	0.46	1.37								0.51	0.75	0.89	1.34	1.02	0.44
	Sp	0.71	0.78	1.11	1.44	0.69									1.36	1.25	1.57	1.15	0.49	1.2
	Sp + oxPLs	0.63	0.72	0.2	1.44	0.65	0.25	0.42	1.03	0.62	0.91	0.86	0.43	0.26	1.42	1.34	2.98	0.43	0.81	0.61	0.97	0.84	1.54
