# Supplementary material for: A highly conserved host lipase deacylates oxidized phospholipids and ameliorates acute lung injury in mice
Source: eLife. 2021 Nov 16;10:e70938. doi: 10.7554/eLife.70938 (PMC8594946; doi:10.7554/eLife.70938)
Supplement: Figure 6—figure supplement 1—source data 1. [file elife-70938-fig6-figsupp1-data1.xlsx]

## Sheet: Fig. 6 figure sup 1. A, B, C
	Figure_6_figure_supplement_1_source_data_1
	Fig. 6--figure supplement 1A
	Relative AOAH mRNA	Aoah+/+					Aoah Tg
	PBS	0.02	0.02	1.44	1.66	0.42	47.07	57.95	44.84	48.39	34.34
	HCl + oxPLs	2.32	2.19	2.58	1.33	2.21	1.38	26.57	29.79	41.98	55.97
	Fig. 6--figure supplement 1B
	Total cells (10^5)	Aoah+/+	Aoah Tg		Neutrophils (10^5)	Aoah+/+	Aoah Tg		Mono-Macs (10^5)	Aoah+/+	Aoah Tg		Lymphocytes (10^5)	Aoah+/+	Aoah Tg
		6.95	4.19			0.02	0.25			6.9	3.92			0.023	0.014
		8.83	3.59			0.29	0.01			8.21	3.57			0.029	0.012
		6.08	4.9			1.09	0.02			4.97	4.87			0.02	0.016
		6.27	4.28			0.17	0.01			6.08	4.25			0.021	0.014
		5.88	9.79			0.27	0.13			5.59	9.63			0.02	0.033
		3.09	3.69			0.01	0.02			3.07	3.65			0.01	0.012
		7.05	7.46			0.423	0.124			6.6	7.31			0.024	0.025
		5.63	4.14			0.038	0.014			5.57	4.11			0.019	0.014
		4.56	4.16			0.061	0.014			4.48	4.13			0.015	0.014
		8.89	4.85			0.356	0.032			8.5	4.8			0.03	0.016
		7.3	2.93			0.19	0.01			7.08	2.91			0.024	0.01
		6.89	3.57			0.14	0.01			6.73	3.55			0.023	0.032
		5.9	4.22			0.26	0.21			5.62	3.99			0.02	0.014
		4.88	3.89			0.08	0.04			4.78	3.84			0.016	0.013
			5.7				0.13				5.55				0.019
	Fig. 6--figure supplement 1C
	BALF IL-6 Protein (pg)	Aoah+/+	Aoah Tg		BALF TNF Protein (pg)	Aoah+/+	Aoah Tg		BALF IL-1β Protein (pg)	Aoah+/+	Aoah Tg
		33.6	25			34.8	44.7			263.8	131.1
		36.3	26.8			32.1	36.3			202.6	212.3
		71.3	19.1			46.7	40.4			229.2	236.4
		21.3	28.5			39	35.8			281.5	115.3
		18.7	25.4			34.8	31			174.3	152.9
		31.1	23.7			37.5	31.9			185.7	174.4
		41.4	22.9			43.1	27.8			307.3	122.2
		28.5	30.6			39.9	33.9			193.1	147.7
		35.2	25.6			37.9	33.2			235.1	139.9
		45	29.4			28.9	37.5
		25.58	23.8			36.4	44.9
		66.54	26.65			48	39.5
		31.31	24.68			32.8	27.2
		85.92	25.22			32.8	27.6
			23.97				25.9
