# Supplementary material for: A highly conserved host lipase deacylates oxidized phospholipids and ameliorates acute lung injury in mice
Source: eLife. 2021 Nov 16;10:e70938. doi: 10.7554/eLife.70938 (PMC8594946; doi:10.7554/eLife.70938)
Supplement: Figure 7—source data 1. [file elife-70938-fig7-data1.xls]

## Sheet: Sheet1
	Figure_7_source_data_1
	Fig. 7A
	Protein (mg)	Aoah+/+							Aoah-/-
	PBS	0.329	0.2	0.247	0.346				0.302	0.285	0.304	0.213
	Ventilation	0.179	0.237	0.285	0.251				0.264	0.386	0.196	0.259
	HCl + Ventilation	0.245	0.336	0.27	0.273	0.237			0.273	0.383	0.273	0.444	0.294	0.456	0.646
	Fig. 7B
	Total cells (10^5)	Aoah+/+																Aoah-/-
	PBS	6.18	6.6	3.44	4.31	5.55	2.84	1.97	3.38	2.01								8.07	5.8	4.35	3.36	7.44	4.28	2.37	2.04	1.89
	Ventilation	3.4	4.28	10.14	9.04	8.26	5.46											8.44	6.18	6.22	9.7	9.12	6.74
	HCl + Ventilation	9.78	6.04	8.76	7.32	6.27	11.61	5.84	5.2	5.32	11.5	9.1						11.62	9.44	9.64	7.96	11.68	9.92	12.24	16.2	13.88	10.42	8.02	14.06	13.1	10.7	6.88	8.93
	Neutrophils (10^5)	Aoah+/+																Aoah-/-
	PBS	0.02	0.02	0.01	0.01	0.02	0.009	0.007	0.011	0.007								0.04	0.03	0.01	0.01	0.02	0.014	0.008	0.007	0.006
	Ventilation	0.02	0.19	0.3	0.75	0.47	1.49											1.58	0.64	0.85	4.37	1.06	1.08
	HCl + Ventilation	3.68	0.56	0.91	3.2	1.34	3.29	1.36	0.68	0.04	5.18	1.7						5.73	3.15	4.56	3.93	8.92	4.51	3.3	9.51	8.33	2.36	0.67	7.87	3.8	6.223	2.844	5.001
	Mono-Macs (10^5)	Aoah+/+																Aoah-/-
	PBS	6.12	6.56	3.41	4.26	5.51	2.82	1.96	3.36	2								8.02	5.32	3.34	7.39	4.28	4.25	2.35	2.03	1.88
	Ventilation	3.37	4.08	9.46	8.26	7.75	4.67											6.84	5.52	5.35	5.3	8	5.64
	HCl + Ventilation	5.74	5.44	7.83	4.1	4.91	6.23	4.47	4.51	5.16	6.29	7.37						5.85	6.23	5.04	4.01	2.73	5.36	8.85	5.72	5.46	8.02	7.3	6.61	9.26	6.43	4.01	3.9
	Lymphocytes (10^5)	Aoah+/+																Aoah-/-
	PBS	0.007	0.04	0.02	0.01	0.03	0.02	0.009	0.007	0.011								0.04	0.03	0.01	0.02	0.02	0.014	0.008	0.007	0.006
	Ventilation	0.01	0.01	0.03	0.03	0.02	0.03											0.03	0.01	0.02	0.03	0.06	0.02
	HCl + Ventilation	0.1	0.12	0.09	0.02	0.02	0.04	0.02	0.02	0.04	0.04	0.03						0.08	0.03	0.1	0.08	0.05	0.05	0.04	0.07	0.08	0.03	0.05	0.05	0.04	0.042	0.023	0.002
	Fig. 7C
	IL-6 (pg)	Aoah+/+												Aoah-/-
	PBS	12.96	13.7	0	0.002	0.001	0.001	0.001							11.04	0	0	0.002	0.002	0.001	0.001
	Ventilation	11.8	9.4	11	15.1	9.3	9.9								21.1	12.4	20.4	113	11.8	17.2
	HCl + Ventilation	14.5	15.9	47.7	41.1	182	38.6	13.6	20.9	14.4					285.9	187.9	162.7	139	37.3	228.3	137.5	170.5	42	150.6	112.1	95.4
	Fig. 7D
	IL-6 Relative mRNA	Aoah+/+												Aoah-/-
	PBS	0.73	0.64	1.73	1.46									1.28	0.83	0.99	0.79
	Ventilation	1.79	0.56	1.04	0.97	0.72	1.38							1.17	1.16	1.36	2.51	0.71	0.68
	HCl + Ventilation	0.61	8.89	0.26	0.43	0.81	1.73	0.62	0.51	0.89	3.43	2.64		2	3.69	4.11	14.3	4.34	6.24	9.66	4.77	1.66	1.86	25.63	2.42
	TNF Relative mRNA	Aoah+/+												Aoah-/-
	PBS	0.8	0.56	1.31	1.11										0.65	1.87	0.66	1.12
	Ventilation	2.21	0.45	1.16	0.86	0.68	1.47								2.54	2.14	1.78	1.61	0.42	0.61
	HCl + Ventilation	0.62	1.61	0.6	0.33	0.52	1.04	0.51	1.04	2.06	0.92				1.53	1.37	2.83	0.84	2.33	2.34	1.93	2	1.52	6.54	1.46	2.07
	IL-1β Relative mRNA	Aoah+/+												Aoah-/-
	PBS	0.46	0.97	1.4	0.79										0.84	1.2	0.83	1.45
	Ventilation	1.59	0.63	1.13	0.89	0.61	1.65								1.69	1.41	2.9	2.02	1.41	1.3
	HCl + Ventilation	2.4	3.68	3.07	3.49	3.89	2.5	2.9	1.63						3.58	1.8	4.04	3.33	5.43	4.21	5.9	6.54	2.82	2.47	3.68	4.03
	KC Relative mRNA	Aoah+/+												Aoah-/-
	PBS	1.66	0.73	1.57	0.87										0.51	1.24	1.92
	Ventilation	2.31	0.43	0.93	1.07	0.6	1.66								2.47	2.54	1.93	2.56
	HCl + Ventilation	1.42	1.39	1.19	0.77	0.67	5.22	1.19	0.85	1.12	2.45				1.41	5.1	7.24	5.37	8.34	8.94	1.97	0.95	8.1	2.18
	MCP-1 Relative mRNA	Aoah+/+												Aoah-/-
	PBS	1.18	1.59	1.44	1.12										2.14	0.96	1.92	1.33
	Ventilation	1.56	0.64	1	1	0.96	1.04								4.32	3.64	3.66	3.98
	HCl + Ventilation	1.16	0.82	0.86	0.71	6.27	1.59	0.73	6.62	6.35					5.85	2.5	6.14	12.23	1.39	26.22	10.29	5.29	2.3	14.95	4.97	2.47	23.14
	Fig. 7E
	Histological Score	Aoah+/+												Aoah-/-
	PBS	0	0.14	0	0	0.14	0	0	0.07						0.14	0	0	0	0.14	0	0.14	0
	HCl + Ventilation	0.34	0.21	0.27	0.14	0.38	0.02	0.41	0.29						0.79	0.43	0.63	0.41	0.36	0.21	0.77	0.29
	Fig. 7F
	EO6 Binding activity (OD)	Aoah+/+														Aoah-/-
	PBS	0.226	0.138	0.184	0.16	0.1095	0.11775	0.09775	0.24375							0.115	0.128	0.181	0.234	0.20425	0.13125	0.21675
	HCl + Ventilation	0.181	0.202	0.15	0.198	0.185	0.289	0.179	0.204	0.141	0.236	0.199	0.295			0.846	0.758	0.343	0.503	0.455	0.199	0.425	0.405	0.322	0.264	0.772	0.893	0.741	0.805	0.798	0.305	0.493
	Fig. 7G
	IL-1β (pg/ml)	Aoah+/+																	Aoah-/-
	PBS BALF	171.4	122.4	52.3	103.4														127.6	129.8	145.7	118.7
	PBS BALF + EO6	133.2	154.6	141.2	111.6														96.6	82	166.3
	HCl + Ventilation	113.7	139.9	241.1	116.9	221	156.7	130.4	186.3	178	77.8	273.7	143.2	253.5	222.2	239.4			334	438.7	251.8	169.3	371.2	222.8	208.3	255.2	218.4	245.7	187.5	150.2	256.7	338.2	180.7	251.3	284.6
	HCl + Ventilation + EO6	185.4	204.5	144.2	94.4	187	116.4	227.2	181.7	196.8									184.8	235.1	190.2	196.5	178.8	118	232.5	85.7	244.4	247.3	249.6
